CORRECTION

# Correction: Consensus structure prediction of *A. thaliana*'s MCTP4 structure using prediction tools and coars grained simulations of transmembrane domain dynamics

Sujith Sritharan, Raphaele Versini, Jules D Petit, Emmanuelle E Bayer, Antoine Taly

The Acknowledgment section for this article is missing. The correct Acknowledgment section is as follows: This work was granted access to the HPC resources of IDRIS under the allocation 2024-A0160715149 made by GENCI to AT.

## Reference

1. Sritharan S, Versini R, Petit JD, Bayer EE, Taly A. Consensus structure prediction of *A. thaliana*'s MCTP4 structure using prediction tools and coarse grained simulations of transmembrane domain dynamics. PLoS One. 2025;20(7):e0326993. <https://doi.org/10.1371/journal.pone.0326993> PMID: [40663537](https://pubmed.ncbi.nlm.nih.gov/40663537/)

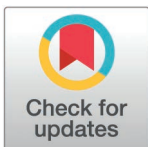

## OPEN ACCESS

**Citation:** Sritharan S, Versini R, Petit JD, Bayer EE, Taly A (2025) Correction: Consensus structure prediction of *A. thaliana*'s MCTP4 structure using prediction tools and coars grained simulations of transmembrane domain dynamics. PLoS One 20(10): e0335771. <https://doi.org/10.1371/journal.pone.0335771>

**Published:** October 30, 2025

**Copyright:** © 2025 Sritharan et al. This is an open access article distributed under the terms of the [Creative Commons Attribution License](https://creativecommons.org/licenses/by/4.0/), which permits unrestricted use, distribution, and reproduction in any medium, provided the original author and source are credited.
